# Supplementary material for: A frequency, coverage, and dispersion analysis of the academic collocation list in university student writing
Source: publisher site journal article supplement (doi:10.1515/iral-2023-0129), 2023-10-07
Supplement: Supplementary file 1 [file j_iral-2023-0129_suppl_001.xlsx]

## Sheet: DPnorm
Word I	POS I	Word II	POS II	DPnorm	Freq in Life Sciences	Freq in Arts & Humanities	Freq in Physical Sciences	Freq in Social Sciences
highly	adv	dependent	adj	0.03	3	4	3	4
closely	adv	resemble	verb	0.05	2	3	2	3
widely	adv	known	vpp	0.05	2	3	2	3
fully	adv	understand	verb	0.05	11	10	10	14
allow	verb	access	noun	0.05	7	8	6	8
fully	adv	developed	vpp	0.06	4	5	3	5
vital	adj	role	noun	0.06	11	11	9	16
prove	verb	useful	adj	0.06	9	10	7	14
particular	adj	area	noun	0.06	8	11	6	12
deep	adj	understanding	noun	0.06	5	9	6	9
available	adj	resource	noun	0.06	7	6	5	8
provide	verb	opportunity	noun	0.06	18	21	16	30
immediately	adv	obvious	adj	0.08	3	4	2	4
advanced	adj	technology	noun	0.08	3	3	2	4
main	adj	area	noun	0.08	14	13	14	16
varying	adj	degree	noun	0.08	10	8	9	14
draw	verb	conclusion	noun	0.08	12	22	18	25
highly	adv	effective	adj	0.09	2	3	3	4
primary	adj	aim	noun	0.09	3	3	3	3
give	verb	insight	noun	0.09	13	13	9	12
great	adj	impact	noun	0.09	9	14	7	12
brief	adj	history	noun	0.1	3	2	2	3
dramatic	adj	change	noun	0.1	4	8	5	9
detailed	adj	study	noun	0.1	3	2	2	3
limited	adj	capacity	noun	0.1	4	3	3	5
whole	adj	range	noun	0.1	5	5	3	7
alternative	adj	way	noun	0.1	5	7	3	8
particularly	adv	useful	adj	0.1	9	10	8	8
have	verb	tendency	noun	0.1	13	11	7	14
early	adj	stage	noun	0.1	46	41	40	40
possible	adj	explanation	noun	0.1	11	8	8	13
give	verb	information	noun	0.1	30	22	19	31
increased	adj	production	noun	0.11	4	3	2	4
public	adj	image	noun	0.11	4	5	2	5
generally	adv	accepted	vpp	0.11	10	10	8	18
fall into	verb	category	noun	0.11	8	8	4	8
pose	verb	problem	noun	0.11	10	18	9	18
natural	adj	disaster	noun	0.11	5	5	4	9
high	adj	probability	noun	0.11	7	4	5	7
newly	adv	formed	vpp	0.13	3	4	2	3
natural	adj	tendency	noun	0.13	2	3	1	3
significant	adj	change	noun	0.13	26	18	13	26
gain	verb	information	noun	0.13	6	5	4	9
easily	adv	accessible	adj	0.13	3	5	5	8
radical	adj	change	noun	0.13	4	7	4	9
particular	adj	focus	noun	0.13	2	2	2	4
major	adj	concern	noun	0.13	5	6	9	9
external	adj	force	noun	0.13	6	5	4	9
large	adj	proportion	noun	0.13	22	18	10	19
key	adj	aspect	noun	0.13	5	5	5	10
typical	adj	example	noun	0.13	3	7	4	5
initial	adj	stage	noun	0.13	12	10	6	10
main	adj	focus	noun	0.13	12	16	7	13
various	adj	aspect	noun	0.13	8	5	6	10
hierarchical	adj	structure	noun	0.13	3	7	6	9
have	verb	access	noun	0.13	32	43	36	75
provide	verb	evidence	noun	0.13	35	55	18	47
play	verb	role	noun	0.13	143	166	70	237
positive	adj	result	noun	0.14	11	9	11	10
significant	adj	factor	noun	0.14	13	9	7	11
close	adj	scrutiny	noun	0.14	1	2	2	3
overall	adj	aim	noun	0.14	3	2	3	3
obvious	adj	reason	noun	0.14	2	3	2	5
contribute	verb	significantly	adv	0.14	3	2	3	5
public	adj	perception	noun	0.14	5	4	3	7
current	adj	trend	noun	0.14	3	3	5	5
seem	verb	unlikely	adj	0.14	7	12	5	13
extensive	adj	research	noun	0.14	5	5	3	4
primary	adj	purpose	noun	0.14	3	2	2	4
provide	verb	source	noun	0.14	12	8	7	10
significant	adj	contribution	noun	0.14	2	5	4	7
rely	verb	heavily	adv	0.14	9	11	7	19
gather	verb	data	noun	0.14	5	3	5	6
integral	adj	part	noun	0.14	10	14	7	22
make	verb	assumption	noun	0.14	5	13	11	18
significant	adj	proportion	noun	0.15	5	4	2	6
small	adj	fraction	noun	0.15	2	3	3	2
fundamental	adj	aspect	noun	0.15	4	3	2	3
certain	adj	circumstance	noun	0.15	6	9	3	11
external	adj	influence	noun	0.15	3	5	3	8
become	verb	visible	adj	0.15	2	4	2	5
large	adj	percentage	noun	0.15	4	3	6	5
significant	adj	number	noun	0.15	6	5	9	10
basic	adj	principle	noun	0.15	8	15	7	9
huge	adj	amount	noun	0.15	7	15	8	18
become	verb	apparent	adj	0.15	20	39	16	26
have	verb	potential	noun	0.15	15	9	12	23
cover	verb	range	noun	0.15	4	4	6	4
main	adj	feature	noun	0.15	4	8	11	10
strong	adj	evidence	noun	0.15	9	14	6	9
give	verb	overview	noun	0.15	5	4	7	9
directly	adv	related	vpp	0.15	11	7	14	17
conduct	verb	analysis	noun	0.15	5	4	2	6
potentially	adv	dangerous	adj	0.17	5	3	5	9
separate	adj	entity	noun	0.17	2	7	6	8
virtually	adv	impossible	adj	0.17	3	5	2	3
particularly	adv	significant	adj	0.17	2	7	4	5
crucial	adj	part	noun	0.17	4	8	3	8
give	verb	explanation	noun	0.17	8	6	2	7
highly	adv	complex	adj	0.17	4	7	2	5
final	adj	stage	noun	0.17	13	11	11	8
readily	adv	available	adj	0.17	12	7	14	18
useful	adj	tool	noun	0.17	14	11	20	26
general	adj	theory	noun	0.17	2	7	5	8
gain	verb	insight	noun	0.17	6	7	2	10
key	adj	feature	noun	0.17	3	12	7	11
wide	adj	range	noun	0.17	72	44	37	80
urban	adj	area	noun	0.17	25	10	15	22
provide	verb	information	noun	0.17	55	29	39	75
critical	adj	role	noun	0.18	3	4	3	8
major	adj	factor	noun	0.18	20	10	10	16
major	adj	component	noun	0.18	3	2	5	4
major	adj	impact	noun	0.18	5	3	4	9
substantial	adj	number	noun	0.18	2	4	2	2
small	adj	proportion	noun	0.18	8	7	5	4
overall	adj	picture	noun	0.18	2	4	1	3
encounter	verb	difficulty	noun	0.18	2	2	1	4
natural	adj	process	noun	0.18	10	7	9	7
small	adj	percentage	noun	0.18	3	3	5	3
personal	adj	interest	noun	0.18	4	5	5	11
positive	adj	feedback	noun	0.18	3	4	3	2
widely	adv	accepted	vpp	0.18	13	19	6	27
show	verb	evidence	noun	0.18	21	15	10	13
deal	verb	issue	noun	0.18	7	3	6	9
main	adj	factor	noun	0.18	12	9	10	25
detailed	adj	information	noun	0.18	9	4	6	11
alternative	adj	explanation	noun	0.18	4	2	2	4
previous	adj	experience	noun	0.18	11	6	11	22
detailed	adj	analysis	noun	0.18	6	15	16	25
make	verb	contribution	noun	0.18	11	13	8	26
use	verb	approach	noun	0.18	18	10	13	28
dramatic	adj	effect	noun	0.19	6	5	5	3
widely	adv	believed	vpp	0.19	5	4	1	5
highly	adv	successful	adj	0.19	1	4	4	5
best	adv	described	vpp	0.19	3	2	4	3
enormous	adj	amount	noun	0.19	4	4	1	6
reach	verb	peak	noun	0.19	5	10	3	6
treat	verb	differently	adv	0.19	3	4	1	3
further	adv	divided	vpp	0.19	3	4	1	3
vary	verb	considerably	adv	0.19	2	4	6	6
negative	adj	aspect	noun	0.19	3	10	4	7
considerable	adj	variation	noun	0.19	2	1	3	3
major	adj	part	noun	0.19	5	9	5	16
employ	verb	technique	noun	0.19	4	5	1	5
use	verb	effectively	adv	0.19	4	10	10	8
directly	adv	connected	vpp	0.19	1	3	2	2
become	verb	evident	adj	0.19	4	5	4	11
similar	adj	situation	noun	0.19	5	9	3	11
small	adj	portion	noun	0.19	2	1	2	4
related	adj	issue	noun	0.19	1	2	2	4
abstract	adj	concept	noun	0.19	4	6	1	5
direct	adj	link	noun	0.19	3	6	2	7
give	verb	access	noun	0.19	4	10	4	6
provide	verb	assistance	noun	0.19	1	2	2	4
clear	adj	evidence	noun	0.19	3	12	7	13
major	adj	difference	noun	0.19	11	7	9	22
statistical	adj	information	noun	0.19	2	1	2	4
brief	adj	overview	noun	0.19	7	5	4	3
valuable	adj	information	noun	0.19	3	6	9	9
strongly	adv	related	vpp	0.19	1	3	2	2
relatively	adv	stable	adj	0.19	4	2	5	6
full	adj	range	noun	0.19	4	10	4	6
highly	adv	significant	adj	0.19	5	8	3	13
internal	adj	structure	noun	0.19	5	6	9	5
differ	verb	significantly	adv	0.19	3	4	1	3
provide	verb	insight	noun	0.19	18	30	7	35
partly	adv	responsible	adj	0.2	5	4	2	3
well	adv	educated	vpp	0.2	4	4	4	2
well	adv	established	vpp	0.2	15	5	14	15
carefully	adv	selected	vpp	0.2	2	2	2	1
undertake	verb	research	noun	0.2	3	2	1	2
previous	adj	generation	noun	0.2	1	3	1	2
change	verb	attitude	noun	0.2	9	6	4	13
increasingly	adv	popular	adj	0.2	5	6	1	8
strong	adj	link	noun	0.2	5	4	2	8
certain	adj	characteristic	noun	0.2	9	5	3	7
naturally	adv	occurring	adj	0.2	13	9	5	7
positive	adj	aspect	noun	0.2	10	7	2	9
physical	adj	characteristic	noun	0.2	2	6	8	6
specific	adj	purpose	noun	0.2	2	8	4	5
make	verb	comment	noun	0.2	6	10	5	4
remain	verb	unchanged	adj	0.2	12	6	11	10
large	adj	portion	noun	0.2	2	3	2	6
main	adj	category	noun	0.2	6	4	1	5
similar	adj	result	noun	0.2	13	8	13	10
have	verb	consequence	noun	0.2	13	23	12	42
make	verb	prediction	noun	0.2	2	7	9	7
prior	adj	knowledge	noun	0.2	10	7	7	5
widely	adv	used	vpp	0.2	28	15	35	28
previous	adj	work	noun	0.2	5	8	13	9
work	verb	effectively	adv	0.22	5	2	6	8
commonly	adv	known	vpp	0.22	4	10	12	8
encounter	verb	problem	noun	0.22	4	2	5	4
traditional	adj	practice	noun	0.22	4	10	2	7
potential	adj	source	noun	0.22	3	3	3	8
diverse	adj	range	noun	0.22	8	7	4	4
seem	verb	appropriate	adj	0.22	3	7	9	13
grow	verb	rapidly	adv	0.22	4	4	6	12
large	adj	quantity	noun	0.22	16	12	13	7
significant	adj	part	noun	0.22	7	10	2	7
give	verb	impression	noun	0.22	12	20	4	13
major	adj	problem	noun	0.22	23	6	16	20
general	adj	trend	noun	0.22	13	12	20	10
complex	adj	relationship	noun	0.22	3	5	3	10
considerable	adj	amount	noun	0.22	10	5	16	17
particularly	adv	relevant	adj	0.22	6	7	1	9
convey	verb	information	noun	0.22	1	4	4	7
specific	adj	area	noun	0.22	11	11	4	23
main	adj	source	noun	0.22	14	12	20	11
key	adj	factor	noun	0.22	13	11	23	31
financial	adj	support	noun	0.22	14	7	4	11
traditional	adj	method	noun	0.22	13	4	9	15
similar	adj	pattern	noun	0.22	9	14	10	5
have	verb	limitation	noun	0.23	4	11	11	23
remarkably	adv	similar	adj	0.23	1	3	1	3
extremely	adv	useful	adj	0.23	4	8	9	5
precise	adj	definition	noun	0.23	1	3	1	3
highly	adv	influential	adj	0.23	2	7	2	5
increase	verb	dramatically	adv	0.23	4	5	11	10
underlying	adj	principle	noun	0.23	4	1	3	4
valuable	adj	resource	noun	0.23	3	1	2	4
key	adj	theme	noun	0.23	3	6	1	6
essential	adj	element	noun	0.23	7	5	3	12
large	adj	majority	noun	0.23	5	9	4	3
active	adj	participant	noun	0.23	2	4	1	2
structural	adj	feature	noun	0.23	5	7	3	3
high	adj	proportion	noun	0.23	24	11	9	16
major	adj	issue	noun	0.23	10	6	4	14
basic	adj	assumption	noun	0.23	3	7	2	8
focal	adj	point	noun	0.23	3	8	4	13
perform	verb	function	noun	0.23	8	10	18	10
increasingly	adv	important	adj	0.23	7	4	7	17
negative	adj	outcome	noun	0.23	3	5	1	3
random	adj	sample	noun	0.23	2	3	2	1
environmental	adj	change	noun	0.23	3	11	4	7
relatively	adv	few	adj	0.23	5	7	3	3
critical	adj	analysis	noun	0.23	6	5	12	13
significant	adj	amount	noun	0.23	10	9	14	6
equally	adv	important	adj	0.23	4	10	3	11
further	adj	evidence	noun	0.23	12	15	6	8
next	adj	generation	noun	0.23	4	7	11	14
focus	verb	attention	noun	0.23	7	7	1	12
provide	verb	overview	noun	0.23	2	5	2	7
complex	adj	system	noun	0.23	4	7	9	16
take into	verb	consideration	noun	0.23	39	22	24	72
high	adj	level	noun	0.23	189	62	160	292
significant	adj	increase	noun	0.24	13	4	7	14
alternative	adj	mean	noun	0.24	1	3	3	2
general	adj	consensus	noun	0.24	1	8	4	8
further	adj	consideration	noun	0.24	1	2	4	3
increasingly	adv	difficult	adj	0.24	10	5	3	10
rapidly	adv	growing	adj	0.24	2	3	5	7
possible	adj	source	noun	0.24	4	5	11	7
commercial	adj	activity	noun	0.24	2	5	1	3
vast	adj	amount	noun	0.24	5	15	11	8
well	adv	documented	vpp	0.24	12	10	8	4
overall	adj	effect	noun	0.24	5	6	5	2
appropriate	adj	level	noun	0.24	5	4	11	11
make	verb	aware	adj	0.24	9	20	3	12
effective	adj	communication	noun	0.24	18	5	9	12
economic	adj	status	noun	0.24	3	9	2	7
evolutionary	adj	process	noun	0.24	5	2	2	5
develop	verb	theory	noun	0.24	17	11	2	15
geographical	adj	area	noun	0.24	6	5	2	11
direct	adj	access	noun	0.24	2	5	1	3
acquire	verb	knowledge	noun	0.24	3	10	4	5
popular	adj	culture	noun	0.24	4	13	3	9
natural	adj	resource	noun	0.24	15	12	6	30
further	adj	study	noun	0.25	11	5	5	15
widely	adv	available	adj	0.25	3	3	7	4
commonly	adv	associated	vpp	0.25	6	9	1	6
dramatic	adj	increase	noun	0.25	5	3	2	8
greatly	adv	influenced	vpp	0.25	2	7	2	4
clear	adj	indication	noun	0.25	1	5	4	10
primary	adj	function	noun	0.25	2	7	2	6
controversial	adj	issue	noun	0.25	2	2	1	5
widely	adv	recognized	vpp	0.25	1	1	2	3
alternative	adj	form	noun	0.25	1	3	2	6
target	noun	audience	noun	0.25	2	6	5	13
central	adj	part	noun	0.25	3	7	2	3
major	adj	contribution	noun	0.25	1	2	1	4
reach	verb	agreement	noun	0.25	2	2	2	6
great	adj	emphasis	noun	0.25	10	18	2	11
closely	adv	linked	vpp	0.25	11	12	4	28
give	verb	indication	noun	0.25	14	16	27	8
make	verb	observation	noun	0.25	2	5	6	12
major	adj	change	noun	0.25	8	6	6	20
provide	verb	indication	noun	0.25	3	3	8	7
certain	adj	aspect	noun	0.25	6	17	4	10
geographical	adj	location	noun	0.25	5	6	2	13
additional	adj	cost	noun	0.25	6	2	5	12
relatively	adv	little	adj	0.25	4	4	1	9
previously	adv	mentioned	vpp	0.25	25	26	10	14
focus on	verb	aspect	noun	0.25	3	3	1	7
recent	adj	decade	noun	0.25	2	7	2	6
social	adj	factor	noun	0.25	20	20	1	25
high	adj	priority	noun	0.25	6	2	4	10
useful	adj	information	noun	0.25	5	10	18	11
slightly	adv	different	adj	0.25	23	26	40	11
first	adj	phase	noun	0.25	6	13	4	5
qualitative	adj	analysis	noun	0.25	4	2	1	4
make	verb	available	adj	0.25	14	7	13	35
relatively	adv	high	adj	0.25	27	6	25	37
address	verb	issue	noun	0.25	14	16	2	33
subsequent	adj	development	noun	0.27	3	3	0	4
following	adj	chapter	noun	0.27	1	3	1	2
highly	adv	controversial	adj	0.27	3	3	0	4
personal	adj	safety	noun	0.27	3	1	1	2
supporting	adj	evidence	noun	0.27	5	7	0	7
crucial	adj	importance	noun	0.27	3	3	0	3
highly	adv	likely	adj	0.27	6	6	1	13
make	verb	living	noun	0.27	6	5	1	4
first	adj	impression	noun	0.27	2	3	0	3
increasing	adj	importance	noun	0.27	5	2	2	6
personal	adj	responsibility	noun	0.27	4	4	0	7
transport	noun	system	noun	0.27	5	1	6	6
convey	verb	message	noun	0.27	3	5	0	5
become	verb	involved	adj	0.27	3	7	3	14
experience	verb	problem	noun	0.27	6	4	1	8
brief	adj	discussion	noun	0.27	1	4	1	3
human	adj	behaviour	noun	0.27	21	18	0	26
demographic	adj	change	noun	0.27	2	3	0	3
narrow	adj	range	noun	0.27	3	1	1	2
physical	adj	appearance	noun	0.27	5	7	0	6
take	verb	responsibility	noun	0.27	11	18	5	36
close	adj	proximity	noun	0.27	19	6	10	10
highly	adv	valued	vpp	0.27	2	3	0	3
alternative	adj	view	noun	0.27	3	4	0	6
extended	adj	period	noun	0.27	5	6	3	2
reduce	verb	likelihood	noun	0.27	2	1	4	4
existing	adj	structure	noun	0.27	3	6	1	8
social	adj	setting	noun	0.27	3	5	0	4
statistical	adj	data	noun	0.27	5	1	3	6
ultimate	adj	goal	noun	0.27	6	5	0	7
central	adj	role	noun	0.27	10	10	0	18
common	adj	feature	noun	0.27	12	20	6	8
little	adj	evidence	noun	0.27	15	26	4	14
specific	adj	characteristic	noun	0.27	2	4	0	3
large	adj	range	noun	0.27	11	4	20	13
face	verb	problem	noun	0.27	6	7	7	21
potential	adj	problem	noun	0.27	12	2	10	13
local	adj	area	noun	0.27	15	5	10	9
take	verb	approach	noun	0.27	7	11	6	25
research	noun	topic	noun	0.27	4	2	5	3
personal	adj	experience	noun	0.27	12	26	2	24
relatively	adv	low	adj	0.27	24	5	27	32
dependent	adj	variable	noun	0.27	5	1	4	9
low	adj	level	noun	0.27	108	20	56	96
previous	adj	research	noun	0.27	17	8	4	11
primary	adj	objective	noun	0.28	1	3	4	7
ever	adv	changing	adj	0.28	2	4	2	9
social	adj	trend	noun	0.28	0	5	4	7
highly	adv	variable	adj	0.28	0	3	2	4
mainly	adv	concerned	vpp	0.28	4	4	3	1
prime	adj	example	noun	0.28	4	11	2	11
take	verb	precedence	noun	0.28	4	8	0	7
heavily	adv	influenced	vpp	0.28	8	11	0	8
wide	adj	area	noun	0.28	0	5	3	5
cultural	adj	change	noun	0.28	4	8	0	5
directly	adv	linked	vpp	0.28	2	6	2	9
analytical	adj	tool	noun	0.28	1	4	3	9
substantial	adj	amount	noun	0.28	4	3	5	13
public	adj	domain	noun	0.28	2	5	1	6
new	adj	insight	noun	0.28	3	4	0	3
basic	adj	information	noun	0.28	2	4	1	7
experience	verb	difficulty	noun	0.28	3	4	0	3
quantitative	adj	method	noun	0.28	8	1	6	9
powerful	adj	tool	noun	0.28	5	6	14	17
initial	adj	phase	noun	0.28	4	3	0	3
key	adj	concept	noun	0.28	4	5	2	12
crucial	adj	role	noun	0.28	8	12	1	22
theoretical	adj	approach	noun	0.28	2	9	3	10
take	verb	role	noun	0.28	8	19	6	35
visual	adj	representation	noun	0.28	0	6	5	10
obtain	verb	data	noun	0.28	6	4	7	3
social	adj	environment	noun	0.28	9	8	0	14
significant	adj	role	noun	0.28	6	16	6	30
provide	verb	access	noun	0.28	5	5	7	19
sexual	adj	abuse	noun	0.28	7	6	0	10
high	adj	quality	noun	0.28	86	14	45	85
high	adj	degree	noun	0.28	14	15	39	44
previous	adj	section	noun	0.28	4	13	20	27
provide	verb	support	noun	0.28	28	11	8	17
diagnostic	adj	test	noun	0.29	2	2	0	4
clearly	adv	demonstrated	vpp	0.29	6	4	0	4
long	adv	established	adj	0.29	2	1	3	6
densely	adv	populated	vpp	0.29	3	2	0	2
greatly	adv	enhance	verb	0.29	0	3	4	5
vital	adj	importance	noun	0.29	2	4	0	4
accept	verb	responsibility	noun	0.29	3	3	0	6
wide	adj	audience	noun	0.29	0	3	3	6
widely	adv	distributed	vpp	0.29	4	2	1	2
major	adj	role	noun	0.29	20	7	5	13
resolve	verb	dispute	noun	0.29	2	3	0	2
treat	verb	equally	adv	0.29	2	2	0	4
changing	adj	pattern	noun	0.29	2	3	0	2
fundamental	adj	principle	noun	0.29	6	4	5	17
great	adj	diversity	noun	0.29	6	5	0	9
technological	adj	advance	noun	0.29	5	13	7	29
potential	adj	conflict	noun	0.29	2	3	1	7
recent	adj	survey	noun	0.29	2	2	0	4
publish	verb	article	noun	0.29	1	1	2	4
previous	adj	knowledge	noun	0.29	3	4	5	1
increasingly	adv	complex	adj	0.29	0	2	3	3
set	verb	goal	noun	0.29	9	1	8	12
commit	verb	crime	noun	0.29	3	9	2	11
carry out	verb	task	noun	0.29	16	7	6	7
manufacturing	adj	sector	noun	0.29	3	2	2	8
further	adj	information	noun	0.29	8	3	4	13
key	adj	role	noun	0.29	10	10	2	25
contain	verb	element	noun	0.29	2	12	10	7
young	adj	generation	noun	0.29	6	9	0	6
brief	adj	description	noun	0.29	3	9	10	5
external	adj	factor	noun	0.29	22	17	7	50
gather	verb	information	noun	0.29	6	1	5	12
short	adj	period	noun	0.29	38	12	9	25
critical	adj	thinking	noun	0.29	2	3	1	7
cultural	adj	background	noun	0.29	3	11	3	13
offer	verb	opportunity	noun	0.29	6	5	4	17
high	adj	rate	noun	0.29	58	14	54	144
recent	adj	research	noun	0.29	18	10	1	15
previously	adv	described	vpp	0.3	2	2	5	2
significantly	adv	high	adj	0.3	21	4	13	13
economic	adj	exploitation	noun	0.3	0	3	2	2
imported	adj	good	noun	0.3	2	5	1	2
striking	adj	feature	noun	0.3	0	2	3	2
prominent	adj	feature	noun	0.3	2	9	2	5
general	adj	overview	noun	0.3	5	2	5	3
highly	adv	desirable	adj	0.3	2	5	1	2
major	adj	source	noun	0.3	1	5	6	13
largely	adv	ignored	vpp	0.3	1	5	1	3
final	adj	point	noun	0.3	3	7	0	4
achieve	verb	outcome	noun	0.3	2	2	1	6
primary	adj	concern	noun	0.3	3	6	2	13
crucial	adj	factor	noun	0.3	3	10	4	19
clearly	adv	defined	vpp	0.3	3	5	12	13
basic	adj	function	noun	0.3	5	4	5	1
common	adj	theme	noun	0.3	3	9	2	4
create	verb	problem	noun	0.3	4	9	6	23
specifically	adv	designed	vpp	0.3	1	3	2	1
cultural	adj	factor	noun	0.3	5	8	0	13
almost	adv	identical	adj	0.3	4	2	4	2
lead to	verb	conclusion	noun	0.3	8	22	6	8
identify	verb	problem	noun	0.3	9	5	3	17
general	adj	principle	noun	0.3	5	7	3	18
underlying	adj	structure	noun	0.3	1	2	3	1
effective	adj	method	noun	0.3	8	2	8	6
comparative	adj	study	noun	0.3	7	6	0	12
quantitative	adj	analysis	noun	0.3	5	1	2	3
cover	verb	area	noun	0.3	11	1	11	13
become	verb	aware	adj	0.3	11	28	13	5
employment	noun	opportunity	noun	0.3	5	4	1	11
process	verb	information	noun	0.3	10	4	3	5
receive	verb	information	noun	0.3	7	3	7	4
key	adj	element	noun	0.3	5	7	5	20
dynamic	adj	system	noun	0.3	3	2	5	2
key	adj	issue	noun	0.3	12	9	4	30
provide	verb	explanation	noun	0.3	7	16	4	30
closely	adv	related	vpp	0.3	35	18	3	33
additional	adj	information	noun	0.3	3	3	9	5
ethnic	adj	group	noun	0.3	15	21	0	41
recent	adj	study	noun	0.32	21	9	2	16
widely	adv	regarded	vpp	0.32	0	3	2	6
sexual	adj	intercourse	noun	0.32	3	8	0	6
powerful	adj	force	noun	0.32	1	7	2	7
underlying	adj	reason	noun	0.32	1	2	1	5
maintain	verb	contact	noun	0.32	6	3	0	4
social	adj	circumstance	noun	0.32	5	3	0	5
come into	verb	contact	noun	0.32	13	19	5	7
provide	verb	alternative	noun	0.32	0	3	4	6
explore	verb	further	adv	0.32	2	5	0	4
close	adj	inspection	noun	0.32	2	13	6	5
primarily	adv	concerned	vpp	0.32	3	11	2	12
central	adj	position	noun	0.32	1	5	1	4
limited	adj	information	noun	0.32	5	2	1	5
key	adj	area	noun	0.32	8	4	2	12
complex	adj	interaction	noun	0.32	6	5	2	2
visual	adj	image	noun	0.32	5	10	0	12
western	adj	society	noun	0.32	5	9	0	14
external	adj	source	noun	0.32	8	2	7	5
provide	verb	foundation	noun	0.32	2	5	1	9
main	adj	characteristic	noun	0.32	3	4	1	10
high	adj	standard	noun	0.32	26	6	15	47
become	verb	available	adj	0.32	13	6	11	5
social	adj	aspect	noun	0.32	6	6	0	14
complex	adj	process	noun	0.32	1	7	3	11
available	adj	data	noun	0.32	8	1	5	5
strong	adj	correlation	noun	0.32	11	2	5	13
vast	adj	majority	noun	0.32	10	34	14	8
strong	adj	relationship	noun	0.32	6	3	9	20
low	adj	probability	noun	0.32	3	2	3	10
human	adj	activity	noun	0.32	18	43	4	18
collect	verb	information	noun	0.32	8	1	5	12
cultural	adj	context	noun	0.32	5	17	1	11
frequently	adv	used	vpp	0.32	5	19	13	7
raise	verb	question	noun	0.32	10	29	6	44
provide	verb	service	noun	0.32	24	3	26	64
meet	verb	criterion	noun	0.33	7	0	8	7
increased	adj	number	noun	0.33	4	1	3	10
potential	adj	risk	noun	0.33	11	0	5	7
highly	adv	charged	vpp	0.33	2	0	3	3
widespread	adj	use	noun	0.33	2	0	3	4
critically	adv	evaluate	verb	0.33	1	1	3	4
fundamental	adj	importance	noun	0.33	1	4	1	6
changing	adj	attitude	noun	0.33	2	4	1	9
key	adj	objective	noun	0.33	3	0	3	3
current	adj	climate	noun	0.33	1	1	3	4
classic	adj	example	noun	0.33	1	11	3	6
single	adj	entity	noun	0.33	2	1	1	5
essential	adj	component	noun	0.33	4	0	3	4
legal	adj	issue	noun	0.33	5	0	7	11
minor	adj	change	noun	0.33	3	0	3	3
distinct	adj	type	noun	0.33	0	2	3	4
make	verb	recommendation	noun	0.33	4	0	3	6
set	verb	target	noun	0.33	7	0	6	12
individual	adj	need	noun	0.33	12	6	3	20
adversely	adv	affect	verb	0.33	12	0	8	14
technical	adj	skill	noun	0.33	2	3	2	9
full	adj	potential	noun	0.33	12	5	4	21
limited	adj	access	noun	0.33	3	1	1	4
minimum	adj	level	noun	0.33	4	0	5	7
top	adj	management	noun	0.33	18	0	12	21
industrial	adj	development	noun	0.33	2	4	0	6
subject	adj	area	noun	0.33	1	3	4	10
resolve	verb	conflict	noun	0.33	1	4	2	9
store	verb	information	noun	0.33	4	0	6	6
critical	adj	issue	noun	0.33	4	0	4	4
give	verb	feedback	noun	0.33	3	0	5	5
technological	adj	development	noun	0.33	2	10	4	19
significantly	adv	affect	verb	0.33	5	0	4	5
natural	adj	environment	noun	0.33	18	16	2	10
offer	verb	insight	noun	0.33	1	4	2	9
low	adj	quality	noun	0.33	11	0	6	8
environmental	adj	issue	noun	0.33	16	1	12	30
enhance	verb	performance	noun	0.33	2	0	3	4
financial	adj	resource	noun	0.33	6	6	5	22
minority	noun	group	noun	0.33	7	16	0	19
final	adj	result	noun	0.33	4	5	15	8
rural	adj	area	noun	0.33	40	12	9	34
statistical	adj	analysis	noun	0.34	30	5	12	15
fully	adv	informed	vpp	0.34	9	2	2	6
immediately	adv	apparent	adj	0.34	1	4	2	1
direct	adj	contact	noun	0.34	17	3	5	14
ever	adv	increasing	adj	0.34	4	4	1	12
greatly	adv	increase	verb	0.34	13	4	6	4
contribute to	verb	development	noun	0.34	2	9	1	7
brief	adj	summary	noun	0.34	4	8	3	1
next	adj	decade	noun	0.34	6	1	3	9
general	adj	category	noun	0.34	0	3	3	2
consider	verb	appropriate	adj	0.34	6	4	0	9
clear	adj	distinction	noun	0.34	4	9	0	12
theoretical	adj	basis	noun	0.34	1	1	1	4
technical	adj	term	noun	0.34	0	3	3	2
academic	adj	discipline	noun	0.34	1	1	1	4
religious	adj	group	noun	0.34	3	9	0	5
external	adj	environment	noun	0.34	31	5	9	23
present	verb	challenge	noun	0.34	0	6	3	3
primary	adj	focus	noun	0.34	2	4	0	2
increasing	adj	demand	noun	0.34	7	3	15	25
economic	adj	factor	noun	0.34	9	25	1	28
basic	adj	concept	noun	0.34	0	5	7	4
place	verb	emphasis	noun	0.34	9	22	1	29
provide	verb	guidance	noun	0.34	3	1	4	11
obtain	verb	information	noun	0.34	15	3	4	9
high	adj	correlation	noun	0.34	6	1	5	16
achieve	verb	goal	noun	0.34	10	14	15	53
find	verb	evidence	noun	0.34	8	21	1	26
statistically	adv	significant	adj	0.34	27	14	0	25
perform	verb	task	noun	0.34	18	5	24	13
face	verb	dilemma	noun	0.36	3	2	0	5
great	adj	proportion	noun	0.36	6	3	1	2
business	noun	transaction	noun	0.36	2	6	0	3
small	adj	quantity	noun	0.36	5	2	10	4
vary	verb	widely	adv	0.36	6	2	1	3
main	adj	principle	noun	0.36	8	3	1	8
moral	adj	dilemma	noun	0.36	4	2	0	2
environmental	adj	factor	noun	0.36	34	10	8	16
great	adj	awareness	noun	0.36	3	2	0	5
slow	adj	process	noun	0.36	5	3	7	2
particular	adj	emphasis	noun	0.36	4	3	0	8
socially	adv	acceptable	adj	0.36	7	3	0	5
particularly	adv	evident	adj	0.36	2	6	0	3
ongoing	adj	debate	noun	0.36	2	3	0	7
minimum	adj	requirement	noun	0.36	4	1	1	4
directly	adv	involved	vpp	0.36	4	4	2	14
normal	adj	condition	noun	0.36	8	2	3	3
nuclear	adj	family	noun	0.36	1	7	1	4
discuss	verb	topic	noun	0.36	7	3	1	3
vary	verb	greatly	adv	0.36	3	11	11	4
generally	adv	agree	verb	0.36	3	9	0	8
primary	adj	reason	noun	0.36	0	4	2	7
entirely	adv	new	adj	0.36	0	6	2	5
continuous	adj	process	noun	0.36	10	2	5	4
brief	adj	introduction	noun	0.36	2	3	0	7
follow	verb	instruction	noun	0.36	6	3	4	1
ongoing	adj	process	noun	0.36	4	2	0	2
reliable	adj	information	noun	0.36	2	2	1	7
previously	adv	discussed	vpp	0.36	8	20	5	4
necessary	adj	information	noun	0.36	4	0	8	8
easy	adj	access	noun	0.36	6	8	3	24
personal	adj	relationship	noun	0.36	8	4	1	12
similar	adj	characteristic	noun	0.36	2	3	2	10
further	adj	development	noun	0.36	5	1	14	9
serve	verb	function	noun	0.36	5	8	1	3
main	adj	issue	noun	0.36	13	6	2	19
key	adj	component	noun	0.36	1	3	1	7
directly	adv	affect	verb	0.36	9	0	9	25
interpersonal	adj	relationship	noun	0.36	4	2	0	4
gain	verb	access	noun	0.36	4	9	7	28
pose	verb	challenge	noun	0.36	2	3	0	7
significant	adj	improvement	noun	0.36	17	3	4	11
specific	adj	type	noun	0.36	10	1	5	5
engage in	verb	activity	noun	0.36	6	3	1	10
commonly	adv	used	vpp	0.36	44	14	40	20
use	verb	technique	noun	0.36	42	18	45	17
local	adj	community	noun	0.36	16	18	8	60
strong	adj	bond	noun	0.37	2	3	11	6
further	adj	investigation	noun	0.37	36	11	15	9
careful	adj	consideration	noun	0.37	2	1	4	9
change	verb	dramatically	adv	0.37	1	4	1	8
historical	adj	analysis	noun	0.37	0	5	2	7
low	adj	percentage	noun	0.37	8	2	1	5
show	verb	trend	noun	0.37	6	0	15	9
pose	verb	threat	noun	0.37	8	13	2	34
global	adj	network	noun	0.37	1	1	4	2
major	adj	challenge	noun	0.37	2	1	4	9
local	adj	economy	noun	0.37	10	8	0	24
academic	adj	year	noun	0.37	6	2	1	7
relatively	adv	simple	adj	0.37	6	4	14	4
limited	adj	resource	noun	0.37	9	3	3	17
further	adj	analysis	noun	0.37	12	3	19	9
provide	verb	feedback	noun	0.37	5	2	1	8
significant	adj	impact	noun	0.37	16	5	11	47
social	adj	context	noun	0.37	12	46	0	25
collect	verb	data	noun	0.37	16	3	7	26
negative	adj	effect	noun	0.37	55	12	16	68
significantly	adv	increase	verb	0.38	10	1	3	8
remain	verb	unclear	adj	0.38	11	10	0	6
major	adj	cause	noun	0.38	16	3	3	12
highly	adv	sensitive	adj	0.38	2	0	3	6
give	verb	consent	noun	0.38	13	8	0	6
previous	adj	decade	noun	0.38	4	3	0	2
characteristic	adj	feature	noun	0.38	5	6	1	2
largely	adv	based	vpp	0.38	5	2	0	4
correct	adj	interpretation	noun	0.38	2	5	0	2
negative	adj	feedback	noun	0.38	4	7	2	1
social	adj	implication	noun	0.38	2	4	0	9
negative	adj	view	noun	0.38	5	9	0	4
strategic	adj	management	noun	0.38	4	0	3	10
modern	adj	technology	noun	0.38	3	2	7	16
traditional	adj	culture	noun	0.38	2	4	0	9
remain	verb	stable	adj	0.38	11	1	3	7
high	adj	expectation	noun	0.38	5	2	1	9
active	adj	participation	noun	0.38	4	2	0	5
physical	adj	property	noun	0.38	12	11	23	2
final	adj	step	noun	0.38	4	0	4	3
scientific	adj	community	noun	0.38	8	0	8	6
medium	noun	coverage	noun	0.38	5	6	0	17
physical	adj	space	noun	0.38	0	5	2	2
final	adj	section	noun	0.38	2	14	2	7
low	adj	status	noun	0.38	8	22	0	9
alternative	adj	model	noun	0.38	2	2	0	6
cultural	adj	practice	noun	0.38	3	2	0	6
primary	adj	education	noun	0.38	5	2	0	4
urban	adj	environment	noun	0.38	4	8	5	0
face	verb	challenge	noun	0.38	2	6	1	14
academic	adj	achievement	noun	0.38	5	2	0	4
conceptual	adj	framework	noun	0.38	4	8	1	20
learning	noun	process	noun	0.38	10	25	2	8
normal	adj	distribution	noun	0.38	13	2	31	14
highly	adv	developed	vpp	0.39	1	6	1	9
brief	adj	account	noun	0.39	0	8	2	4
counter	adj	argument	noun	0.39	1	7	1	3
useful	adj	source	noun	0.39	1	7	4	2
symbiotic	adj	relationship	noun	0.39	9	3	0	5
objective	adj	reality	noun	0.39	1	4	0	2
academic	adj	world	noun	0.39	0	3	1	4
highly	adv	problematic	adj	0.39	1	4	0	2
hardly	adv	surprising	adj	0.39	3	8	0	3
moral	adj	principle	noun	0.39	2	7	0	7
negative	adj	side	noun	0.39	1	2	2	8
vast	adj	number	noun	0.39	3	11	7	2
inextricably	adv	linked	vpp	0.39	2	8	0	7
greatly	adv	reduced	vpp	0.39	13	1	10	7
dominant	adj	culture	noun	0.39	0	4	1	3
distinct	adj	group	noun	0.39	4	1	1	6
cultural	adj	aspect	noun	0.39	2	8	2	2
major	adj	advantage	noun	0.39	3	1	8	11
cultural	adj	tradition	noun	0.39	4	4	0	13
draw	verb	line	noun	0.39	1	4	14	8
technical	adj	knowledge	noun	0.39	4	0	2	6
internal	adj	control	noun	0.39	3	0	2	7
face	verb	difficulty	noun	0.39	0	3	5	9
environmental	adj	effect	noun	0.39	12	3	8	4
key	adj	characteristic	noun	0.39	3	1	1	7
national	adj	average	noun	0.39	6	1	1	4
clearly	adv	visible	adj	0.39	3	4	11	3
strongly	adv	influenced	vpp	0.39	1	4	0	2
future	adj	development	noun	0.39	3	0	7	7
direct	adj	relationship	noun	0.39	1	7	1	7
show	verb	variation	noun	0.39	10	7	16	2
achieve	verb	objective	noun	0.39	5	2	13	21
close	adj	look	noun	0.39	2	12	2	5
discuss	verb	issue	noun	0.39	4	5	4	21
social	adj	inequality	noun	0.39	4	8	1	21
make	verb	distinction	noun	0.39	6	39	3	25
complex	adj	structure	noun	0.39	9	6	3	1
cognitive	adj	ability	noun	0.39	19	8	0	9
central	adj	government	noun	0.39	10	8	39	18
facial	adj	expression	noun	0.39	19	9	2	6
contain	verb	information	noun	0.39	6	9	23	6
further	adj	research	noun	0.39	59	18	12	23
standard	adj	error	noun	0.39	11	2	6	28
previous	adj	study	noun	0.39	31	6	22	13
underlying	adj	cause	noun	0.41	4	2	0	7
reduce	verb	stress	noun	0.41	6	0	3	3
occur	verb	naturally	adv	0.41	4	4	1	1
set	verb	objective	noun	0.41	2	1	6	9
undertake	verb	work	noun	0.41	6	0	3	3
originally	adv	intended	vpp	0.41	0	4	1	4
extremely	adv	complex	adj	0.41	2	0	4	2
broad	adj	definition	noun	0.41	0	3	1	5
final	adj	outcome	noun	0.41	2	1	3	10
highly	adv	unlikely	adj	0.41	2	5	2	15
effective	adj	management	noun	0.41	5	1	15	7
main	adj	theme	noun	0.41	3	14	2	5
fundamental	adj	difference	noun	0.41	3	10	0	13
general	adj	conclusion	noun	0.41	5	1	4	2
limited	adj	range	noun	0.41	4	2	2	0
main	adj	function	noun	0.41	9	13	34	8
explore	verb	issue	noun	0.41	1	4	0	4
assume	verb	role	noun	0.41	2	6	0	10
make	verb	statement	noun	0.41	3	21	2	18
long	adj	duration	noun	0.41	6	1	1	5
relevant	adj	literature	noun	0.41	6	1	3	2
active	adj	role	noun	0.41	3	10	1	22
direct	adj	impact	noun	0.41	2	1	3	10
background	noun	knowledge	noun	0.41	2	8	4	1
create	verb	opportunity	noun	0.41	1	6	2	15
remain	verb	constant	adj	0.41	24	7	48	17
positive	adj	outcome	noun	0.41	16	7	0	7
broad	adj	range	noun	0.41	4	1	9	17
conduct	verb	study	noun	0.41	14	4	2	6
meet	verb	requirement	noun	0.41	10	2	38	24
economic	adj	activity	noun	0.41	6	15	4	42
provide	verb	example	noun	0.41	3	21	4	36
empirical	adj	research	noun	0.41	3	7	0	16
draw	verb	attention	noun	0.41	6	50	5	24
independent	adj	variable	noun	0.41	28	3	10	44
great	adj	equality	noun	0.42	0	3	1	6
particularly	adv	concerned	vpp	0.42	3	1	0	3
geographical	adj	distribution	noun	0.42	3	1	0	3
career	noun	opportunity	noun	0.42	2	0	1	4
changing	adj	circumstance	noun	0.42	0	4	1	5
become	verb	widespread	adj	0.42	2	1	0	4
prove	verb	successful	adj	0.42	2	2	9	14
closely	adv	associated	vpp	0.42	2	8	0	9
potential	adj	benefit	noun	0.42	9	1	4	21
become	verb	independent	adj	0.42	2	4	1	12
crucial	adj	difference	noun	0.42	0	2	2	7
closely	adv	tied	vpp	0.42	2	1	0	4
industrial	adj	production	noun	0.42	0	3	1	6
make	verb	judgement	noun	0.42	11	23	4	4
test	verb	theory	noun	0.42	8	2	5	2
meaningful	adj	way	noun	0.42	2	1	1	7
increase	verb	awareness	noun	0.42	11	5	1	24
specific	adj	function	noun	0.42	8	5	1	2
numerous	adj	study	noun	0.42	7	1	1	5
dynamic	adj	nature	noun	0.42	2	1	0	4
specific	adj	question	noun	0.42	6	2	0	6
broad	adj	category	noun	0.42	6	1	1	3
given	adj	information	noun	0.42	12	4	0	6
academic	adj	research	noun	0.42	0	3	1	6
personal	adj	communication	noun	0.42	6	1	1	3
close	adj	relationship	noun	0.42	13	5	3	32
slightly	adv	high	adj	0.42	16	2	23	10
political	adj	context	noun	0.42	2	13	1	14
raise	verb	awareness	noun	0.42	15	4	3	26
primary	adj	source	noun	0.42	5	23	2	9
physical	adj	environment	noun	0.42	4	3	0	12
field	noun	research	noun	0.42	10	0	4	14
establish	verb	relationship	noun	0.42	2	7	3	21
social	adj	relationship	noun	0.42	12	7	0	29
local	adj	government	noun	0.42	22	5	57	21
newly	adv	discovered	vpp	0.43	0	1	2	4
equally	adv	valid	adj	0.43	0	6	1	4
continued	adj	growth	noun	0.43	1	0	2	4
easily	adv	understood	vpp	0.43	0	6	1	3
vital	adj	part	noun	0.43	9	2	1	4
brief	adj	period	noun	0.43	1	6	1	2
newly	adv	acquired	vpp	0.43	0	6	2	2
accurate	adj	description	noun	0.43	1	8	5	2
significant	adj	development	noun	0.43	0	10	2	9
public	adj	awareness	noun	0.43	4	0	2	9
classical	adj	theory	noun	0.43	3	0	11	7
physical	adj	feature	noun	0.43	0	6	1	3
great	adj	potential	noun	0.43	5	1	5	2
totally	adv	different	adj	0.43	0	4	1	6
actively	adv	involved	vpp	0.43	2	2	2	11
provide	verb	benefit	noun	0.43	4	1	9	21
give	verb	evidence	noun	0.43	4	13	0	26
strong	adj	tendency	noun	0.43	2	6	0	2
underlying	adj	assumption	noun	0.43	2	6	0	13
create	verb	environment	noun	0.43	3	3	3	16
dynamic	adj	process	noun	0.43	1	0	2	4
distinctive	adj	feature	noun	0.43	0	10	2	10
positive	adj	correlation	noun	0.43	20	1	5	18
conduct	verb	research	noun	0.43	16	4	3	28
individual	adj	characteristic	noun	0.43	3	1	1	9
social	adj	interaction	noun	0.43	31	13	3	69
high	adj	value	noun	0.43	30	5	92	39
use	verb	data	noun	0.43	12	3	53	27
informed	adj	consent	noun	0.44	17	7	0	6
adverse	adj	effect	noun	0.44	28	3	5	26
strongly	adv	suggest	verb	0.44	9	6	0	3
identify	verb	factor	noun	0.44	3	2	3	15
male	adj	dominance	noun	0.44	0	11	2	5
severely	adv	affect	verb	0.44	4	1	0	3
commonly	adv	accepted	vpp	0.44	0	5	1	7
growing	adj	awareness	noun	0.44	2	1	0	5
comprehensive	adj	system	noun	0.44	2	1	0	5
serious	adj	consequence	noun	0.44	5	1	2	1
bear	verb	resemblance	noun	0.44	3	7	2	0
easily	adv	identified	vpp	0.44	4	6	1	1
fully	adv	aware	adj	0.44	3	7	1	1
rapid	adj	expansion	noun	0.44	0	4	1	8
numerical	adj	data	noun	0.44	2	0	5	2
legal	adj	requirement	noun	0.44	8	0	2	6
essential	adj	feature	noun	0.44	0	5	1	7
alternative	adj	strategy	noun	0.44	4	1	0	2
draw	verb	distinction	noun	0.44	1	5	0	6
next	adj	phase	noun	0.44	4	1	3	1
central	adj	issue	noun	0.44	1	4	0	7
plausible	adj	explanation	noun	0.44	0	7	1	4
final	adj	phase	noun	0.44	2	1	5	1
academic	adj	study	noun	0.44	1	7	0	4
record	verb	data	noun	0.44	7	1	7	3
identify	verb	issue	noun	0.44	7	0	2	7
alternative	adj	method	noun	0.44	15	4	13	4
promote	verb	development	noun	0.44	10	1	2	10
environmental	adj	concern	noun	0.44	9	2	2	18
additional	adj	support	noun	0.44	4	1	0	3
common	adj	goal	noun	0.44	2	3	2	13
collective	adj	identity	noun	0.44	1	4	0	7
negative	adj	value	noun	0.44	5	1	17	7
give	verb	priority	noun	0.44	3	3	1	13
follow	verb	procedure	noun	0.44	5	2	0	9
main	adj	component	noun	0.44	6	2	8	2
high	adj	percentage	noun	0.44	32	5	6	13
federal	adj	government	noun	0.44	1	7	0	4
traditional	adj	approach	noun	0.44	3	6	2	21
sufficient	adj	condition	noun	0.44	0	7	1	4
public	adj	sector	noun	0.44	5	0	14	20
social	adj	norm	noun	0.44	2	18	1	17
environmental	adj	impact	noun	0.44	28	2	24	13
overall	adj	performance	noun	0.44	5	0	16	17
high	adj	frequency	noun	0.44	14	14	40	3
significant	adj	effect	noun	0.44	56	8	17	18
increased	adj	level	noun	0.46	6	1	1	9
free	adj	access	noun	0.46	2	1	1	8
wide	adj	issue	noun	0.46	1	6	0	7
clearly	adv	evident	adj	0.46	0	1	2	5
highly	adv	structured	vpp	0.46	1	5	0	2
basic	adj	premise	noun	0.46	0	6	1	7
crucial	adj	question	noun	0.46	1	2	0	6
increasing	adj	pressure	noun	0.46	2	0	6	9
preceding	adj	discussion	noun	0.46	0	2	0	5
legal	adj	action	noun	0.46	1	1	2	8
equal	adj	access	noun	0.46	3	1	1	10
democratic	adj	institution	noun	0.46	0	3	1	8
sufficient	adj	resource	noun	0.46	1	0	3	4
leading	adj	role	noun	0.46	1	5	1	1
human	adj	society	noun	0.46	0	16	3	21
major	adj	reason	noun	0.46	0	4	1	10
main	adj	argument	noun	0.46	0	18	4	7
impose	verb	restriction	noun	0.46	1	2	1	8
little	adj	impact	noun	0.46	3	3	1	14
infinite	adj	number	noun	0.46	1	7	8	2
consider	verb	possibility	noun	0.46	1	6	0	8
scarce	adj	resource	noun	0.46	1	0	2	5
close	adj	examination	noun	0.46	0	3	1	8
living	adj	standard	noun	0.46	7	10	1	38
allocate	verb	resource	noun	0.46	3	0	7	14
final	adj	decision	noun	0.46	2	1	7	14
mental	adj	illness	noun	0.46	39	12	1	16
cultural	adj	norm	noun	0.46	1	6	0	8
mutually	adv	exclusive	adj	0.46	6	8	0	28
local	adj	authority	noun	0.46	14	13	86	38
social	adj	status	noun	0.46	14	56	0	19
increased	adj	risk	noun	0.47	10	2	2	3
strongly	adv	associated	vpp	0.47	3	3	0	1
previously	adv	thought	vpp	0.47	2	14	1	5
universally	adv	accepted	vpp	0.47	0	7	1	3
firmly	adv	established	vpp	0.47	0	9	1	6
legal	adj	proceeding	noun	0.47	4	0	1	4
accurate	adj	picture	noun	0.47	3	2	5	0
high	adj	turnover	noun	0.47	2	2	8	25
critical	adj	evaluation	noun	0.47	2	6	5	0
newly	adv	established	adj	0.47	4	2	0	1
technical	adj	support	noun	0.47	3	0	5	2
competitive	adj	pressure	noun	0.47	2	0	1	6
cultural	adj	institution	noun	0.47	0	1	2	6
great	adj	significance	noun	0.47	3	14	0	5
defining	adj	characteristic	noun	0.47	0	3	0	4
meet	verb	objective	noun	0.47	10	0	3	14
appropriate	adj	action	noun	0.47	4	0	1	4
roughly	adv	equal	adj	0.47	0	1	2	6
radically	adv	different	adj	0.47	0	12	3	4
political	adj	debate	noun	0.47	0	5	1	11
reliable	adj	data	noun	0.47	2	1	7	2
seem	verb	plausible	adj	0.47	1	10	0	5
accurate	adj	information	noun	0.47	6	0	2	10
racial	adj	group	noun	0.47	7	5	0	2
modern	adj	society	noun	0.47	4	48	4	76
nuclear	adj	weapon	noun	0.47	0	11	2	18
legal	adj	framework	noun	0.47	8	1	2	17
government	noun	policy	noun	0.47	10	21	10	85
test	noun	score	noun	0.47	7	2	1	2
social	adj	structure	noun	0.47	9	59	0	86
negative	adj	impact	noun	0.47	25	4	5	52
low	adj	frequency	noun	0.47	9	6	19	1
empirical	adj	study	noun	0.47	7	2	1	19
climate	noun	change	noun	0.47	34	9	31	7
positive	adj	effect	noun	0.47	15	9	5	61
use	verb	method	noun	0.47	98	21	117	31
optimal	adj	solution	noun	0.47	3	0	8	15
future	adj	research	noun	0.47	16	18	1	5
premature	adj	death	noun	0.48	5	1	0	4
broad	adj	spectrum	noun	0.48	9	0	2	4
profound	adj	effect	noun	0.48	9	2	1	3
strongly	adv	linked	vpp	0.48	3	0	1	6
historical	adj	account	noun	0.48	0	11	1	6
obvious	adj	difference	noun	0.48	5	8	0	2
standard	adj	method	noun	0.48	8	0	5	3
general	adj	agreement	noun	0.48	6	2	1	1
interested	adj	party	noun	0.48	1	0	5	4
become	verb	obvious	adj	0.48	0	10	1	8
constant	adj	rate	noun	0.48	4	0	13	5
make	verb	contact	noun	0.48	12	4	1	3
well	adv	aware	adj	0.48	1	11	1	4
financial	adj	assistance	noun	0.48	4	0	1	5
direct	adj	consequence	noun	0.48	2	4	0	13
purchasing	adj	power	noun	0.48	9	3	3	33
economic	adj	change	noun	0.48	3	6	0	20
holistic	adj	approach	noun	0.48	10	1	1	9
make	verb	adjustment	noun	0.48	2	0	9	9
secondary	adj	source	noun	0.48	0	11	1	6
complex	adj	issue	noun	0.48	5	2	0	13
social	adj	phenomenon	noun	0.48	2	3	0	11
disclose	verb	information	noun	0.48	3	0	1	6
new	adj	perspective	noun	0.48	1	10	0	7
support	verb	argument	noun	0.48	3	24	0	27
develop	verb	strategy	noun	0.48	11	2	2	26
positive	adj	value	noun	0.48	3	0	13	13
organizational	adj	structure	noun	0.48	8	0	2	11
cultural	adj	heritage	noun	0.48	1	9	0	11
political	adj	participation	noun	0.48	1	6	0	14
receive	verb	feedback	noun	0.48	4	1	0	5
indigenous	adj	people	noun	0.48	1	10	1	25
prior	adj	experience	noun	0.48	1	0	3	6
statistical	adj	significance	noun	0.5	7	1	0	4
ideally	adv	suited	vpp	0.5	4	0	5	2
private	adj	individual	noun	0.5	1	2	1	9
scientific	adj	method	noun	0.5	11	22	3	2
key	adj	principle	noun	0.5	0	1	4	6
increased	adj	demand	noun	0.5	5	1	0	6
directly	adv	affected	vpp	0.5	6	0	2	14
central	adj	theme	noun	0.5	1	11	0	10
unequal	adj	power	noun	0.5	1	3	0	9
meet	verb	target	noun	0.5	1	0	5	5
international	adj	agreement	noun	0.5	3	0	1	8
carry out	verb	research	noun	0.5	17	5	1	5
dominant	adj	role	noun	0.5	0	2	2	9
simplified	adj	version	noun	0.5	0	1	6	3
technological	adj	progress	noun	0.5	2	6	0	18
entire	adj	range	noun	0.5	0	2	6	2
entirely	adv	different	adj	0.5	0	17	1	9
basic	adj	element	noun	0.5	2	2	6	0
anecdotal	adj	evidence	noun	0.5	6	1	0	4
critical	adj	factor	noun	0.5	3	1	10	31
conduct	verb	survey	noun	0.5	3	0	1	8
socially	adv	constructed	vpp	0.5	3	12	0	34
assess	verb	impact	noun	0.5	5	1	0	5
identify	verb	area	noun	0.5	10	1	1	11
rural	adj	population	noun	0.5	3	1	0	7
personal	adj	information	noun	0.5	3	0	5	18
negative	adj	correlation	noun	0.5	17	0	3	8
political	adj	party	noun	0.5	1	25	2	55
interpret	verb	data	noun	0.51	8	0	1	4
demographic	adj	characteristic	noun	0.51	6	1	0	6
increased	adj	productivity	noun	0.51	1	1	1	7
sufficient	adj	evidence	noun	0.51	2	4	0	14
increasing	adj	awareness	noun	0.51	6	1	0	6
fully	adv	integrated	vpp	0.51	0	2	1	7
directly	adv	proportional	adj	0.51	6	1	19	5
deeply	adv	rooted	vpp	0.51	2	2	1	12
high	adj	profile	noun	0.51	2	2	2	14
direct	adj	evidence	noun	0.51	6	9	1	1
environmental	adj	damage	noun	0.51	2	0	1	7
business	noun	sector	noun	0.51	3	1	1	12
alternative	adj	source	noun	0.51	2	1	2	12
original	adj	source	noun	0.51	1	1	8	3
formal	adj	structure	noun	0.51	0	10	1	4
political	adj	structure	noun	0.51	0	10	1	18
critical	adj	theory	noun	0.51	1	5	0	14
verbal	adj	communication	noun	0.51	19	7	2	3
cast	verb	doubt	noun	0.51	3	16	1	4
sufficient	adj	information	noun	0.51	3	0	1	9
economic	adj	power	noun	0.51	1	11	0	16
contemporary	adj	society	noun	0.51	1	21	0	16
pose	verb	question	noun	0.51	1	12	2	3
linear	adj	relationship	noun	0.51	16	0	56	19
scientific	adj	research	noun	0.51	19	2	4	6
social	adj	exclusion	noun	0.51	8	3	0	26
comparative	adj	analysis	noun	0.51	2	5	1	19
conduct	verb	interview	noun	0.51	10	2	0	15
empirical	adj	data	noun	0.51	3	4	2	22
social	adj	theory	noun	0.51	20	3	0	18
urban	adj	development	noun	0.51	1	4	3	0
renewable	adj	energy	noun	0.51	2	0	11	10
affect	verb	outcome	noun	0.52	5	0	1	10
vast	adj	array	noun	0.52	1	6	2	0
close	adj	contact	noun	0.52	17	3	3	4
ethical	adj	dilemma	noun	0.52	4	1	1	15
commonly	adv	found	vpp	0.52	14	10	1	2
evolutionary	adj	theory	noun	0.52	12	4	0	3
changing	adj	need	noun	0.52	5	0	1	8
highly	adv	efficient	adj	0.52	1	0	4	8
cultural	adj	issue	noun	0.52	2	2	0	10
basic	adj	component	noun	0.52	0	3	5	1
increasing	adj	trend	noun	0.52	1	0	6	7
specific	adj	reference	noun	0.52	1	1	0	5
annual	adj	rate	noun	0.52	1	0	3	10
intrinsic	adj	value	noun	0.52	2	5	1	20
ethnic	adj	community	noun	0.52	1	1	0	5
technical	adj	detail	noun	0.52	0	1	5	2
transmit	verb	information	noun	0.52	0	1	5	2
quantitative	adj	approach	noun	0.52	5	0	1	2
natural	adj	science	noun	0.52	3	8	0	27
social	adj	dimension	noun	0.52	1	3	0	10
historical	adj	context	noun	0.52	1	20	0	23
competitive	adj	market	noun	0.52	7	3	9	48
raise	verb	issue	noun	0.52	5	6	4	37
financial	adj	institution	noun	0.52	1	2	9	30
little	adj	research	noun	0.52	9	1	0	6
educational	adj	system	noun	0.52	1	3	0	10
extract	verb	information	noun	0.52	0	4	4	1
initial	adj	position	noun	0.52	0	15	9	3
theoretical	adj	model	noun	0.52	2	0	12	12
individual	adj	difference	noun	0.52	24	3	2	9
descriptive	adj	statistic	noun	0.52	7	1	0	8
genetic	adj	variation	noun	0.53	9	1	0	7
valid	adj	argument	noun	0.53	0	15	3	4
sexual	adj	behaviour	noun	0.53	3	3	0	16
profound	adj	impact	noun	0.53	2	1	0	8
key	adj	player	noun	0.53	4	1	0	13
far	adv	removed	vpp	0.53	0	11	2	3
set	verb	agenda	noun	0.53	1	1	1	8
original	adj	position	noun	0.53	0	1	4	12
natural	adj	world	noun	0.53	4	31	5	5
previous	adj	paragraph	noun	0.53	1	3	6	0
core	adj	value	noun	0.53	6	0	1	11
rapidly	adv	changing	adj	0.53	2	0	1	8
fundamental	adj	question	noun	0.53	2	1	0	8
pilot	noun	study	noun	0.53	8	0	1	9
strategic	adj	decision	noun	0.53	1	0	4	11
economic	adj	interest	noun	0.53	1	8	0	24
religious	adj	belief	noun	0.53	8	37	0	9
legal	adj	status	noun	0.53	1	4	0	13
first	adj	generation	noun	0.53	0	2	12	18
share	verb	information	noun	0.53	5	0	6	2
potential	adj	impact	noun	0.53	8	0	1	8
cognitive	adj	skill	noun	0.53	6	3	0	1
empirical	adj	support	noun	0.53	3	2	0	13
quantitative	adj	data	noun	0.53	20	0	2	11
national	adj	policy	noun	0.53	5	1	1	18
cultural	adj	difference	noun	0.53	8	12	3	61
ethnic	adj	minority	noun	0.53	16	4	0	52
positive	adj	impact	noun	0.53	8	4	3	39
positive	adj	relationship	noun	0.53	9	3	1	35
theoretical	adj	framework	noun	0.53	1	7	0	21
pivotal	adj	role	noun	0.55	0	3	0	5
extremely	adv	sensitive	adj	0.55	2	0	4	1
modern	adj	culture	noun	0.55	0	5	0	8
religious	adj	freedom	noun	0.55	0	3	0	8
natural	adj	law	noun	0.55	0	18	0	33
heated	adj	debate	noun	0.55	0	4	0	3
human	adj	specie	noun	0.55	0	3	0	7
historical	adj	evidence	noun	0.55	0	7	0	8
internal	adj	affair	noun	0.55	0	6	0	4
domestic	adj	sphere	noun	0.55	0	8	0	20
ruling	adj	class	noun	0.55	0	27	0	16
political	adj	reality	noun	0.55	0	6	0	7
contemporary	adj	world	noun	0.55	0	7	0	8
concerted	adj	effort	noun	0.55	0	2	0	5
shared	adj	experience	noun	0.55	0	4	0	3
central	adj	importance	noun	0.55	0	8	0	7
dividing	adj	line	noun	0.55	0	5	0	3
scientific	adj	theory	noun	0.55	4	23	5	1
social	adj	reform	noun	0.55	0	9	0	11
small	adj	minority	noun	0.55	0	8	0	4
deem	verb	necessary	adj	0.55	3	1	0	11
conflicting	adj	interest	noun	0.55	2	2	0	11
literary	adj	text	noun	0.55	0	8	0	6
racial	adj	difference	noun	0.55	0	4	0	6
political	adj	climate	noun	0.55	0	16	0	14
external	adj	threat	noun	0.55	0	4	0	5
political	adj	arena	noun	0.55	0	3	0	8
historical	adj	perspective	noun	0.55	0	4	0	9
political	adj	authority	noun	0.55	0	15	0	9
central	adj	feature	noun	0.55	0	5	0	4
dominant	adj	ideology	noun	0.55	0	7	0	16
central	adj	authority	noun	0.55	0	8	0	7
social	adj	construct	noun	0.55	0	5	0	5
crucial	adj	point	noun	0.55	0	7	3	1
potential	adj	customer	noun	0.55	2	0	9	25
economic	adj	prosperity	noun	0.55	0	7	0	7
negative	adj	connotation	noun	0.55	1	20	0	8
cultural	adj	influence	noun	0.55	0	11	0	8
assume	verb	responsibility	noun	0.55	3	0	2	14
guiding	adj	principle	noun	0.55	0	2	1	9
stark	adj	contrast	noun	0.55	0	23	1	9
take	verb	initiative	noun	0.55	0	3	1	11
fundamental	adj	change	noun	0.55	0	6	0	15
strong	adj	emphasis	noun	0.55	0	6	0	9
military	adj	power	noun	0.55	0	8	0	9
traditional	adj	value	noun	0.55	0	9	0	13
special	adj	status	noun	0.55	0	7	0	5
social	adj	transformation	noun	0.55	0	3	0	5
racial	adj	discrimination	noun	0.55	0	6	0	8
minimum	adj	wage	noun	0.55	0	4	0	10
political	adj	agenda	noun	0.55	0	9	0	17
political	adj	ideology	noun	0.55	0	9	0	12
relevant	adj	data	noun	0.55	1	0	10	8
military	adj	force	noun	0.55	0	11	0	21
total	adj	income	noun	0.55	0	2	0	5
fundamentally	adv	different	adj	0.55	0	6	0	10
alternative	adj	interpretation	noun	0.55	0	7	0	4
dominant	adj	discourse	noun	0.55	0	3	0	6
seminal	adj	work	noun	0.55	0	5	0	3
social	adj	institution	noun	0.55	0	8	0	22
structural	adj	change	noun	0.55	15	1	1	27
literal	adj	meaning	noun	0.55	0	6	0	10
employ	verb	method	noun	0.55	0	4	0	3
impose	verb	constraint	noun	0.55	0	2	0	5
make	verb	explicit	adj	0.55	0	3	0	4
cultural	adj	diversity	noun	0.55	0	12	0	10
methodological	adj	approach	noun	0.55	0	4	0	3
political	adj	institution	noun	0.55	0	8	0	20
social	adj	organization	noun	0.55	0	7	0	8
ethnic	adj	identity	noun	0.55	0	7	0	5
national	adj	government	noun	0.55	8	5	5	49
economic	adj	condition	noun	0.55	0	12	0	12
research	noun	finding	noun	0.55	11	1	0	10
economic	adj	benefit	noun	0.55	7	7	2	45
domestic	adj	violence	noun	0.55	11	5	0	45
increase	verb	likelihood	noun	0.55	5	0	1	15
early	adj	work	noun	0.55	2	20	2	5
social	adj	welfare	noun	0.55	3	3	0	17
national	adj	security	noun	0.55	0	10	0	19
secondary	adj	education	noun	0.55	0	4	0	6
significantly	adv	reduced	vpp	0.56	11	0	10	3
medical	adj	treatment	noun	0.56	16	1	0	8
increased	adj	pressure	noun	0.56	4	0	3	1
low	adj	intensity	noun	0.56	6	0	7	2
private	adj	sphere	noun	0.56	0	15	0	43
successful	adj	implementation	noun	0.56	0	1	14	9
government	noun	intervention	noun	0.56	3	5	1	26
economic	adj	structure	noun	0.56	2	7	1	29
provide	verb	summary	noun	0.56	0	7	0	3
national	adj	economy	noun	0.56	2	6	0	23
domestic	adj	market	noun	0.56	10	2	1	38
low	adj	class	noun	0.56	20	106	0	24
cultural	adj	value	noun	0.56	3	7	0	29
national	adj	identity	noun	0.56	0	40	1	16
obtain	verb	result	noun	0.56	19	1	14	4
available	adj	evidence	noun	0.57	8	5	0	1
physical	adj	symptom	noun	0.57	6	2	0	1
chemical	adj	reaction	noun	0.57	5	2	16	1
fulfil	verb	obligation	noun	0.57	1	1	0	6
contemporary	adj	issue	noun	0.57	0	10	0	4
promote	verb	equality	noun	0.57	0	2	0	6
rich	adj	source	noun	0.57	6	2	0	1
acutely	adv	aware	adj	0.57	1	5	0	1
historical	adj	background	noun	0.57	0	2	1	9
academic	adj	debate	noun	0.57	0	4	0	12
great	adj	autonomy	noun	0.57	1	1	0	6
markedly	adv	different	adj	0.57	1	5	0	1
seem	verb	obvious	adj	0.57	0	10	2	2
fundamental	adj	assumption	noun	0.57	1	1	0	6
political	adj	dimension	noun	0.57	2	1	0	9
disposable	adj	income	noun	0.57	16	3	3	67
positive	adj	image	noun	0.57	3	1	0	12
provide	verb	illustration	noun	0.57	0	3	0	9
vested	adj	interest	noun	0.57	0	8	0	24
dominant	adj	position	noun	0.57	0	4	0	12
closely	adv	connected	vpp	0.57	0	10	0	4
government	noun	department	noun	0.57	1	0	6	2
fundamental	adj	problem	noun	0.57	2	3	2	22
economic	adj	theory	noun	0.57	0	11	0	33
social	adj	isolation	noun	0.57	6	1	0	2
facilitate	verb	development	noun	0.57	2	1	0	9
basic	adj	structure	noun	0.57	2	17	7	0
meet	verb	expectation	noun	0.57	3	0	2	15
specific	adj	need	noun	0.57	4	1	1	18
educational	adj	opportunity	noun	0.57	0	2	0	6
intellectual	adj	property	noun	0.57	1	0	13	17
economic	adj	policy	noun	0.57	2	22	2	79
statistical	adj	method	noun	0.57	10	0	3	2
alternative	adj	approach	noun	0.57	1	2	2	15
gender	noun	equality	noun	0.57	2	2	1	15
physical	adj	health	noun	0.57	12	1	0	5
positive	adj	attitude	noun	0.57	18	1	0	13
social	adj	identity	noun	0.57	6	38	0	9
empirical	adj	evidence	noun	0.57	9	16	1	82
normal	adj	development	noun	0.58	7	8	0	1
political	adj	significance	noun	0.58	0	8	1	2
vast	adj	area	noun	0.58	0	8	2	1
economic	adj	stability	noun	0.58	0	3	1	13
feminist	adj	movement	noun	0.58	2	3	0	16
relatively	adv	constant	adj	0.58	6	0	2	1
minimum	adj	standard	noun	0.58	3	1	1	16
political	adj	reform	noun	0.58	1	2	0	10
social	adj	behaviour	noun	0.58	16	1	0	30
individual	adj	choice	noun	0.58	3	2	0	16
appropriate	adj	response	noun	0.58	1	0	2	10
vary	verb	significantly	adv	0.58	4	0	4	1
environmental	adj	degradation	noun	0.58	3	1	0	13
international	adj	organization	noun	0.58	4	0	1	16
cultural	adj	identity	noun	0.58	1	18	0	6
low	adj	income	noun	0.58	33	0	1	23
high	adj	incidence	noun	0.6	13	2	0	4
political	adj	philosophy	noun	0.6	0	6	0	21
cultural	adj	significance	noun	0.6	0	2	0	7
established	adj	order	noun	0.6	2	11	0	2
common	adj	source	noun	0.6	3	11	0	1
literal	adj	interpretation	noun	0.6	0	2	0	7
military	adj	service	noun	0.6	0	11	0	4
independent	adj	state	noun	0.6	0	4	1	17
original	adj	text	noun	0.6	0	14	1	4
reach	verb	consensus	noun	0.6	1	0	1	7
shared	adj	value	noun	0.6	0	2	0	8
consistent	adj	result	noun	0.6	3	1	6	0
final	adj	product	noun	0.6	22	0	34	6
empirical	adj	work	noun	0.6	1	1	0	7
global	adj	market	noun	0.6	6	9	9	81
economic	adj	crisis	noun	0.6	1	6	0	24
adopt	verb	approach	noun	0.6	6	4	2	41
social	adj	mobility	noun	0.6	1	25	0	8
negative	adj	attitude	noun	0.6	20	4	0	5
significant	adj	relationship	noun	0.6	11	0	1	4
raw	adj	data	noun	0.6	14	2	13	1
data	noun	set	noun	0.6	23	2	55	7
safe	adj	sex	noun	0.61	2	0	0	7
single	adj	currency	noun	0.61	0	0	3	6
acceptable	adj	behaviour	noun	0.61	3	0	0	11
common	adj	ancestor	noun	0.61	12	0	0	9
practical	adj	consideration	noun	0.61	0	0	3	4
personal	adj	choice	noun	0.61	4	0	0	3
deem	verb	appropriate	adj	0.61	3	0	0	4
creative	adj	thinking	noun	0.61	0	0	5	3
legal	adj	protection	noun	0.61	9	0	0	9
foreign	adj	currency	noun	0.61	0	0	11	25
core	adj	issue	noun	0.61	8	0	0	6
industrialized	adj	country	noun	0.61	3	0	0	8
global	adj	perspective	noun	0.61	2	0	0	7
interpersonal	adj	skill	noun	0.61	7	0	0	13
individual	adj	responsibility	noun	0.61	5	0	0	17
strategic	adj	objective	noun	0.61	0	0	7	10
professional	adj	body	noun	0.61	7	0	0	8
mutual	adj	trust	noun	0.61	3	0	0	4
skilled	adj	worker	noun	0.61	0	3	0	11
political	adj	stability	noun	0.61	0	8	0	29
extensively	adv	used	vpp	0.61	7	1	1	1
senior	adj	management	noun	0.61	0	0	10	22
increasing	adj	interest	noun	0.61	5	0	0	7
integrated	adj	approach	noun	0.61	4	0	0	3
dominant	adj	group	noun	0.61	2	0	0	5
private	adj	investment	noun	0.61	1	2	1	15
qualitative	adj	approach	noun	0.61	4	0	0	3
improved	adj	performance	noun	0.61	0	0	3	6
public	adj	institution	noun	0.61	2	0	0	5
common	adj	method	noun	0.61	9	0	12	2
positively	adv	correlated	vpp	0.61	4	0	0	11
significant	adj	influence	noun	0.61	0	3	1	15
emotional	adj	support	noun	0.61	7	0	0	5
negative	adj	consequence	noun	0.61	16	1	0	6
historical	adj	data	noun	0.61	0	0	5	7
publicly	adv	available	adj	0.61	0	0	4	3
mental	adj	state	noun	0.61	37	45	1	2
qualitative	adj	data	noun	0.61	13	0	0	11
complete	verb	task	noun	0.61	29	1	20	4
high	adj	score	noun	0.61	33	2	6	6
high	adj	education	noun	0.61	7	5	0	45
scientific	adj	evidence	noun	0.62	12	0	0	5
historical	adj	reality	noun	0.62	0	6	0	2
moral	adj	philosophy	noun	0.62	0	9	0	3
continued	adj	existence	noun	0.62	0	6	0	2
experimental	adj	evidence	noun	0.62	8	1	4	0
further	adj	explanation	noun	0.62	1	9	2	0
technical	adj	aspect	noun	0.62	1	1	7	1
collective	adj	memory	noun	0.62	0	6	0	2
traditional	adj	view	noun	0.62	1	31	1	8
political	adj	instability	noun	0.62	0	5	0	19
technological	adj	innovation	noun	0.62	1	4	0	19
established	adj	principle	noun	0.64	0	1	1	8
substantial	adj	evidence	noun	0.64	5	1	0	1
accurate	adj	measurement	noun	0.64	3	0	10	1
ethical	adj	consideration	noun	0.64	10	1	0	3
future	adj	prospect	noun	0.64	0	0	15	6
developmental	adj	process	noun	0.64	5	1	0	1
unskilled	adj	worker	noun	0.64	0	2	0	8
party	noun	leader	noun	0.64	0	2	0	8
individual	adj	right	noun	0.64	0	8	0	34
climatic	adj	condition	noun	0.64	13	3	0	2
high	adj	intensity	noun	0.64	7	0	19	2
relevant	adj	factor	noun	0.64	10	1	0	3
seek	verb	information	noun	0.64	2	0	0	8
secondary	adj	data	noun	0.64	1	1	0	8
foreign	adj	investor	noun	0.64	6	0	0	24
occur	verb	frequently	adv	0.64	10	2	2	0
institutional	adj	structure	noun	0.64	1	2	1	17
sexual	adj	violence	noun	0.64	0	4	0	16
service	noun	sector	noun	0.64	0	0	12	49
third	adj	party	noun	0.64	5	2	12	76
experimental	adj	condition	noun	0.64	10	1	4	0
randomly	adv	selected	vpp	0.64	7	1	6	0
significant	adj	difference	noun	0.64	123	14	14	21
significant	adj	reduction	noun	0.65	9	0	7	1
internal	adj	conflict	noun	0.65	0	4	0	18
perceived	adj	threat	noun	0.65	0	1	1	9
communicate	verb	effectively	adv	0.65	16	3	0	3
government	noun	expenditure	noun	0.65	1	1	1	13
highly	adv	competitive	adj	0.65	0	0	4	18
legal	adj	right	noun	0.65	1	6	0	31
traditional	adj	form	noun	0.65	0	28	2	6
historical	adj	event	noun	0.65	1	21	0	5
economic	adj	inequality	noun	0.65	0	1	1	9
high	adj	concentration	noun	0.66	62	3	15	4
significant	adj	figure	noun	0.66	0	6	9	0
well	adv	received	vpp	0.66	5	2	0	0
first	adj	contact	noun	0.66	3	5	0	0
clearly	adv	understand	verb	0.66	0	11	0	3
commonly	adv	referred	vpp	0.66	0	2	5	0
risk	noun	assessment	noun	0.66	54	0	16	4
quantitative	adj	research	noun	0.66	28	0	0	10
emotional	adj	reaction	noun	0.66	2	5	0	0
strongly	adv	agree	verb	0.66	3	4	0	0
foreign	adj	policy	noun	0.66	0	16	0	78
make	verb	arrangement	noun	0.67	1	1	0	10
national	adj	income	noun	0.67	1	4	1	31
theoretical	adj	concept	noun	0.67	1	0	1	10
great	adj	flexibility	noun	0.67	0	0	3	15
institutional	adj	framework	noun	0.67	8	0	0	40
educational	adj	institution	noun	0.67	1	3	0	20
political	adj	leader	noun	0.67	0	4	0	20
social	adj	background	noun	0.67	52	9	4	5
public	adj	transport	noun	0.67	6	1	69	17
qualitative	adj	method	noun	0.67	35	0	2	10
ethical	adj	problem	noun	0.69	1	0	1	11
legal	adj	rule	noun	0.69	1	1	0	11
early	adj	period	noun	0.69	4	55	1	8
create	verb	impression	noun	0.69	0	21	1	4
urban	adj	centre	noun	0.69	2	12	0	1
academic	adj	journal	noun	0.69	0	8	1	1
solar	adj	system	noun	0.69	2	3	15	0
source	noun	material	noun	0.69	3	12	0	0
local	adj	culture	noun	0.69	1	2	1	22
research	noun	evidence	noun	0.69	16	3	0	2
economic	adj	reform	noun	0.69	0	6	0	33
economic	adj	resource	noun	0.69	0	2	1	16
technological	adj	change	noun	0.69	3	3	1	37
international	adj	community	noun	0.69	3	7	0	53
rural	adj	community	noun	0.69	34	5	0	6
specific	adj	context	noun	0.69	1	8	0	1
civil	adj	society	noun	0.69	7	7	2	84
natural	adj	right	noun	0.7	0	3	0	17
industrial	adj	country	noun	0.7	1	0	0	6
central	adj	tenet	noun	0.7	0	1	0	6
rising	adj	cost	noun	0.7	0	0	1	6
short	adj	duration	noun	0.7	10	1	0	2
broadly	adv	defined	vpp	0.7	0	1	0	6
highly	adv	skilled	adj	0.7	0	0	1	6
indigenous	adj	population	noun	0.7	0	17	0	4
unique	adj	opportunity	noun	0.7	0	1	0	6
economic	adj	success	noun	0.7	2	0	0	12
physical	adj	science	noun	0.7	2	2	13	0
technical	adj	expertise	noun	0.7	0	1	0	6
liberal	adj	democracy	noun	0.7	0	5	0	30
multiple	adj	identity	noun	0.7	0	2	0	12
ruling	adj	party	noun	0.7	0	1	0	6
complex	adj	set	noun	0.7	1	0	0	6
due	adj	process	noun	0.7	3	3	1	41
academic	adj	community	noun	0.7	1	13	0	2
process	verb	data	noun	0.7	1	1	13	2
high	adj	status	noun	0.7	4	57	0	9
obvious	adj	example	noun	0.71	1	14	1	1
capitalist	adj	economy	noun	0.71	0	2	0	13
legal	adj	obligation	noun	0.71	2	1	0	19
economic	adj	relation	noun	0.71	1	2	0	20
internal	adj	market	noun	0.71	2	2	0	25
creative	adj	process	noun	0.71	1	2	10	0
political	adj	factor	noun	0.71	0	3	0	19
cognitive	adj	development	noun	0.71	46	5	7	1
correct	verb	error	noun	0.71	0	1	7	1
significant	adj	correlation	noun	0.71	18	0	1	4
statistical	adj	test	noun	0.71	14	0	0	4
serious	adj	offence	noun	0.72	0	0	1	7
privileged	adj	position	noun	0.72	0	1	0	7
historical	adj	record	noun	0.72	1	0	0	7
experimental	adj	method	noun	0.72	5	0	14	0
random	adj	error	noun	0.72	4	0	7	0
seek	verb	help	noun	0.72	11	1	0	2
political	adj	environment	noun	0.72	1	1	1	21
regulatory	adj	agency	noun	0.72	0	0	1	7
functional	adj	requirement	noun	0.72	10	0	5	0
reduce	verb	emission	noun	0.72	3	0	5	0
strategic	adj	planning	noun	0.72	2	0	2	28
environmental	adj	protection	noun	0.72	6	0	2	56
survey	noun	data	noun	0.72	1	0	0	7
original	adj	data	noun	0.72	2	0	6	0
private	adj	sector	noun	0.72	6	2	7	104
legal	adj	position	noun	0.74	0	2	0	15
commit	verb	offence	noun	0.74	0	3	0	22
practical	adj	difficulty	noun	0.74	0	0	1	8
natural	adj	order	noun	0.74	0	16	1	2
national	adj	boundary	noun	0.74	0	3	0	24
require	verb	consideration	noun	0.74	1	0	0	8
middle	adj	income	noun	0.74	0	0	1	8
democratic	adj	society	noun	0.74	1	3	0	31
cultural	adj	dimension	noun	0.74	1	1	0	15
convey	verb	meaning	noun	0.74	0	16	2	1
visual	adj	perception	noun	0.74	8	2	0	0
physical	adj	world	noun	0.74	3	33	1	2
public	adj	debate	noun	0.74	1	0	0	8
social	adj	integration	noun	0.74	0	1	0	8
legal	adj	system	noun	0.74	1	12	1	112
foreign	adj	investment	noun	0.74	1	1	8	80
beneficial	adj	effect	noun	0.75	17	1	0	3
prominent	adj	member	noun	0.75	0	6	0	1
democratic	adj	state	noun	0.75	0	3	0	25
nuclear	adj	energy	noun	0.75	0	0	8	2
creative	adj	work	noun	0.75	0	1	8	1
gender	noun	stereotype	noun	0.75	0	12	0	2
state	noun	sector	noun	0.75	3	0	0	25
public	adj	expenditure	noun	0.75	0	2	0	17
provide	verb	care	noun	0.75	21	3	0	2
freely	adv	available	adj	0.75	1	1	12	1
national	adj	interest	noun	0.75	1	5	1	59
highly	adv	educated	vpp	0.75	0	2	0	17
qualitative	adj	study	noun	0.75	13	0	0	3
collective	adj	action	noun	0.75	0	2	0	17
minimum	adj	value	noun	0.75	2	0	12	1
public	adj	policy	noun	0.75	1	2	1	34
economic	adj	growth	noun	0.75	6	12	7	219
primary	adj	care	noun	0.76	36	2	2	4
social	adj	democracy	noun	0.76	0	1	0	9
sovereign	adj	state	noun	0.76	0	2	0	18
individual	adj	interest	noun	0.76	0	1	0	10
ethical	adj	issue	noun	0.76	72	0	3	13
effective	adj	policy	noun	0.76	1	0	0	10
regulatory	adj	framework	noun	0.76	1	1	0	19
explanatory	adj	power	noun	0.76	0	2	1	27
final	adj	position	noun	0.76	0	19	2	1
social	adj	policy	noun	0.76	1	7	0	73
experimental	adj	data	noun	0.76	7	4	48	0
criminal	adj	offence	noun	0.78	0	0	1	11
full	adj	employment	noun	0.78	2	1	0	33
sharp	adj	contrast	noun	0.78	0	7	0	1
equal	adj	opportunity	noun	0.78	1	2	0	33
store	verb	data	noun	0.78	0	1	9	1
relevant	adj	information	noun	0.78	76	0	5	11
mean	adj	score	noun	0.78	14	3	0	0
academic	adj	writing	noun	0.78	0	7	0	1
mental	adj	health	noun	0.78	101	0	0	21
living	adj	organism	noun	0.79	20	2	1	0
regional	adj	variation	noun	0.79	0	15	0	2
individual	adj	behaviour	noun	0.79	2	0	0	24
experiential	adj	learning	noun	0.79	10	1	0	1
flexible	adj	approach	noun	0.79	1	0	0	13
deep	adj	level	noun	0.79	0	8	0	1
religious	adj	practice	noun	0.79	1	39	0	4
national	adj	culture	noun	0.79	0	1	1	23
global	adj	economy	noun	0.79	0	4	2	74
financial	adj	market	noun	0.79	5	0	2	82
qualitative	adj	research	noun	0.79	85	0	0	16
receive	verb	treatment	noun	0.8	27	0	0	5
capitalist	adj	society	noun	0.8	0	1	0	14
global	adj	trade	noun	0.8	0	0	1	14
public	adj	sphere	noun	0.8	0	1	0	14
graphical	adj	representation	noun	0.8	1	2	22	1
nuclear	adj	power	noun	0.8	0	2	21	2
political	adj	economy	noun	0.8	0	3	0	42
effective	adj	treatment	noun	0.81	12	1	1	0
critical	adj	introduction	noun	0.81	0	9	0	1
ethical	adj	principle	noun	0.81	6	0	0	1
political	adj	consciousness	noun	0.81	0	10	0	1
global	adj	capitalism	noun	0.81	0	0	1	18
class	noun	consciousness	noun	0.81	0	10	0	1
give	verb	consideration	noun	0.81	0	0	1	16
learning	noun	strategy	noun	0.81	0	9	1	0
sexual	adj	orientation	noun	0.81	0	1	0	16
religious	adj	movement	noun	0.83	0	2	0	46
free	adj	movement	noun	0.83	0	1	0	22
positive	adj	connotation	noun	0.83	0	11	0	1
low	adj	unemployment	noun	0.83	1	0	0	19
great	adj	accuracy	noun	0.83	1	0	13	1
public	adj	authority	noun	0.83	1	0	0	19
social	adj	responsibility	noun	0.83	2	3	2	150
physical	adj	activity	noun	0.84	58	2	1	5
direct	adj	involvement	noun	0.84	1	0	0	32
external	adj	world	noun	0.84	1	52	2	1
solar	adj	energy	noun	0.84	2	0	14	0
political	adj	culture	noun	0.84	0	2	0	49
high	adj	unemployment	noun	0.84	0	2	0	56
information	noun	processing	noun	0.84	14	1	1	0
social	adj	movement	noun	0.84	0	2	0	57
official	adj	statistic	noun	0.85	1	0	0	46
significant	adj	interaction	noun	0.85	8	0	0	1
experimental	adj	result	noun	0.85	5	1	46	0
cause	verb	stress	noun	0.86	17	0	1	1
economic	adj	integration	noun	0.86	1	0	0	53
structural	adj	adjustment	noun	0.86	2	0	0	99
armed	adj	conflict	noun	0.86	0	1	0	56
longitudinal	adj	study	noun	0.88	19	2	0	0
rural	adj	economy	noun	0.88	10	0	0	1
environmental	adj	pollution	noun	0.88	10	0	0	1
natural	adj	language	noun	0.88	0	19	0	1
capitalist	adj	system	noun	0.89	0	0	0	7
low	adj	turnover	noun	0.89	0	0	0	7
legislative	adj	power	noun	0.89	0	0	0	7
lifelong	adj	learning	noun	0.89	0	0	0	24
welfare	noun	reform	noun	0.89	0	0	0	15
economic	adj	goal	noun	0.89	0	0	0	7
national	adj	institution	noun	0.89	0	0	0	8
exceptional	adj	case	noun	0.89	0	0	0	9
national	adj	legislation	noun	0.89	0	0	0	10
advanced	adj	economy	noun	0.89	0	0	0	13
global	adj	issue	noun	0.89	0	0	0	10
virtual	adj	community	noun	0.89	0	0	0	7
professional	adj	practice	noun	0.89	11	0	1	0
global	adj	structure	noun	0.89	0	0	0	7
environmental	adj	policy	noun	0.89	0	0	0	62
presidential	adj	election	noun	0.89	0	0	0	8
institutional	adj	arrangement	noun	0.89	0	0	0	19
coping	adj	strategy	noun	0.89	45	1	0	3
theoretical	adj	perspective	noun	0.89	0	0	0	10
annual	adj	report	noun	0.91	5	0	147	6
native	adj	speaker	noun	0.91	1	50	0	0
experimental	adj	design	noun	0.93	17	0	1	0
historical	adj	writing	noun	0.94	0	22	0	0
major	adj	theme	noun	0.94	0	14	0	0
individual	adj	variation	noun	0.94	0	10	0	0
daily	adj	living	noun	0.99	19	0	0	0
current	adj	technology	noun	1	0	0	7	0
individual	adj	component	noun	1	0	0	13	0
artificial	adj	intelligence	noun	1	0	0	23	0
finite	adj	number	noun	1	0	0	11	0
transmit	verb	data	noun	1	0	0	9	0
